# Supplementary material
Source: PubMed Central journal article supplement (PMC4868827)
Supplement: JZUSB17-0367-TS1.pdf [file JZUSB17-0367-TS1.pdf]

Table S1 Haplotype diversities of seven clusters in Uyghur male individuals (*n*=94)

| DXS10135-DXS8378-DXS10148 |        |           | DXS7132-DXS10074-DXS10079-DXS10075 |        |           | DXS10103-HPRTB-DXS10101 |        |           | DXS10134-DXS7423 |        |           | DXS10159-DXS10162-DXS10164 |        |           | DXS6809-DXS6789 |        |           | DXS7424-DXS101 |        |           |
|---------------------------|--------|-----------|------------------------------------|--------|-----------|-------------------------|--------|-----------|------------------|--------|-----------|----------------------------|--------|-----------|-----------------|--------|-----------|----------------|--------|-----------|
| Haplotype                 | Number | Frequency | Haplotype                          | Number | Frequency | Haplotype               | Number | Frequency | Haplotype        | Number | Frequency | Haplotype                  | Number | Frequency | Haplotype       | Number | Frequency | Haplotype      | Number | Frequency |
| 16-12-24.1                | 1      | 0.0106383 | 11-15-23-17                        | 1      | 0.0106383 | 15-12-33                | 1      | 0.0106383 | 32-14            | 1      | 0.0106383 | 22-19-11                   | 1      | 0.0106383 | 28-21           | 1      | 0.0106383 | 13-24          | 3      | 0.0319149 |
| 17-10-20                  | 1      | 0.0106383 | 11-18-20-17                        | 1      | 0.0106383 | 15-12-34                | 1      | 0.0106383 | 32-15            | 1      | 0.0106383 | 22-19-13                   | 1      | 0.0106383 | 29-20           | 1      | 0.0106383 | 13-25          | 2      | 0.0212766 |
| 18-10-18                  | 1      | 0.0106383 | 12-13-19-16                        | 1      | 0.0106383 | 15-14-32                | 1      | 0.0106383 | 33-13            | 1      | 0.0106383 | 23-16-10                   | 1      | 0.0106383 | 29-22           | 1      | 0.0106383 | 13-26          | 5      | 0.0531915 |
| 18-11-25.1                | 1      | 0.0106383 | 12-15-21-17                        | 1      | 0.0106383 | 16-11-32                | 1      | 0.0106383 | 33-14            | 2      | 0.0212766 | 23-16-12                   | 1      | 0.0106383 | 30-16           | 1      | 0.0106383 | 13-27          | 1      | 0.0106383 |
| 18-12-21                  | 1      | 0.0106383 | 12-16-20-18                        | 1      | 0.0106383 | 16-11-33                | 1      | 0.0106383 | 33-15            | 5      | 0.0531915 | 23-17-10                   | 2      | 0.0212766 | 30-20           | 1      | 0.0106383 | 14-18          | 1      | 0.0106383 |
| 19-10-29.1                | 1      | 0.0106383 | 12-16-20-18                        | 1      | 0.0106383 | 16-12-32                | 3      | 0.0319149 | 34-13            | 1      | 0.0106383 | 23-18-11                   | 1      | 0.0106383 | 31-15           | 3      | 0.0319149 | 14-23          | 2      | 0.0212766 |
| 19-11-22.1                | 1      | 0.0106383 | 12-18-19-18                        | 1      | 0.0106383 | 16-13-30                | 2      | 0.0212766 | 34-14            | 1      | 0.0106383 | 23-18-13                   | 1      | 0.0106383 | 31-20           | 2      | 0.0212766 | 14-25          | 1      | 0.0106383 |
| 19-11-26.1                | 1      | 0.0106383 | 12-18-20-17                        | 1      | 0.0106383 | 16-13-31                | 2      | 0.0212766 | 34-15            | 4      | 0.0425532 | 23-19-11                   | 1      | 0.0106383 | 31-21           | 3      | 0.0319149 | 14-29          | 1      | 0.0106383 |
| 19-12-24                  | 1      | 0.0106383 | 12-18-22-17                        | 1      | 0.0106383 | 16-13-32                | 2      | 0.0212766 | 34-16            | 2      | 0.0212766 | 24-16-11                   | 2      | 0.0212766 | 31-22           | 3      | 0.0319149 | 15-15          | 1      | 0.0106383 |
| 20-10-19                  | 2      | 0.0212766 | 12-20-19-17                        | 1      | 0.0106383 | 16-13-33                | 1      | 0.0106383 | 35-14            | 5      | 0.0531915 | 24-17-10                   | 4      | 0.0425532 | 32-15           | 2      | 0.0212766 | 15-18          | 1      | 0.0106383 |
| 20-10-24.1                | 1      | 0.0106383 | 13-7-19-13                         | 1      | 0.0106383 | 16-13-34                | 1      | 0.0106383 | 35-15            | 5      | 0.0531915 | 24-17-13                   | 1      | 0.0106383 | 32-16           | 3      | 0.0319149 | 15-22          | 1      | 0.0106383 |
| 20-11-28.1                | 2      | 0.0212766 | 13-15-20-16                        | 1      | 0.0106383 | 16-13-35                | 1      | 0.0106383 | 36-13            | 3      | 0.0319149 | 24-17-13                   | 1      | 0.0106383 | 32-19           | 4      | 0.0425532 | 15-23          | 4      | 0.0425532 |
| 20-12-18                  | 1      | 0.0106383 | 13-15-20-17                        | 1      | 0.0106383 | 16-14-30                | 2      | 0.0212766 | 36-14            | 9      | 0.0957447 | 24-18-10                   | 7      | 0.0744681 | 32-20           | 5      | 0.0531915 | 15-24          | 5      | 0.0531915 |
| 20-12-27.1                | 1      | 0.0106383 | 13-15-21-16                        | 1      | 0.0106383 | 16-14-31                | 2      | 0.0212766 | 36-15            | 10     | 0.106383  | 24-18-11                   | 4      | 0.0425532 | 32-21           | 9      | 0.0957447 | 15-25          | 8      | 0.0851064 |
| 21-10-18                  | 1      | 0.0106383 | 13-16-16-16                        | 1      | 0.0106383 | 16-14-32                | 2      | 0.0212766 | 36-16            | 2      | 0.0212766 | 24-19-9                    | 1      | 0.0106383 | 33-15           | 2      | 0.0212766 | 15-26          | 2      | 0.0212766 |
| 21-10-22.1                | 1      | 0.0106383 | 13-16-18-17                        | 1      | 0.0106383 | 16-14-33                | 1      | 0.0106383 | 37-14            | 6      | 0.0638298 | 24-19-10                   | 5      | 0.0531915 | 33-16           | 6      | 0.0638298 | 15-27          | 1      | 0.0106383 |
| 21-10-26.1                | 1      | 0.0106383 | 13-16-18-18                        | 1      | 0.0106383 | 16-15-30                | 1      | 0.0106383 | 37-15            | 9      | 0.0957447 | 24-19-11                   | 1      | 0.0106383 | 33-19           | 1      | 0.0106383 | 16-15          | 2      | 0.0212766 |
| 21-11-22.1                | 1      | 0.0106383 | 13-16-20-16                        | 1      | 0.0106383 | 16-15-31                | 4      | 0.0425532 | 37-16            | 3      | 0.0319149 | 24-20-10                   | 1      | 0.0106383 | 33-20           | 4      | 0.0425532 | 16-18          | 2      | 0.0212766 |
| 21-11-26.1                | 1      | 0.0106383 | 13-16-20-17                        | 3      | 0.0319149 | 17-11-31                | 1      | 0.0106383 | 37-16            | 3      | 0.0319149 | 24-20-13                   | 1      | 0.0106383 | 33-21           | 6      | 0.0638298 | 16-20          | 1      | 0.0106383 |
| 21-12-19                  | 1      | 0.0106383 | 13-16-23-17                        | 1      | 0.0106383 | 17-11-31                | 1      | 0.0106383 | 37-15            | 1      | 0.0106383 | 24-21-10                   | 1      | 0.0106383 | 33-22           | 5      | 0.0531915 | 16-21          | 3      | 0.0319149 |
| 21-12-22.1                | 1      | 0.0106383 | 13-16-23-17                        | 1      | 0.0106383 | 17-12-34                | 1      | 0.0106383 | 38-14            | 1      | 0.0106383 | 25-15-11                   | 1      | 0.0106383 | 33-23           | 1      | 0.0106383 | 16-22          | 1      | 0.0106383 |
| 1.1-10-24.1               | 1      | 0.0106383 | 13-17-17-16                        | 1      | 0.0106383 | 17-13-30                | 1      | 0.0106383 | 38-15            | 5      | 0.0531915 | 25-16-10                   | 1      | 0.0106383 | 34-15           | 3      | 0.0319149 | 16-23          | 3      | 0.0319149 |
| 1.1-11-24.1               | 1      | 0.0106383 | 13-17-19-16                        | 1      | 0.0106383 | 17-13-31                | 1      | 0.0106383 | 38.2-15          | 1      | 0.0106383 | 25-17-10                   | 2      | 0.0212766 | 34-16           | 3      | 0.0319149 | 16-24          | 10     | 0.106383  |
| 22-9-25.1                 | 1      | 0.0106383 | 13-17-20-17                        | 3      | 0.0319149 | 17-13-34                | 1      | 0.0106383 | 38.3-16          | 1      | 0.0106383 | 25-17-12                   | 1      | 0.0106383 | 34-19           | 1      | 0.0106383 | 16-25          | 8      | 0.0851064 |
| 22-10-19                  | 1      | 0.0106383 | 13-17-20-18                        | 1      | 0.0106383 | 17-14-28                | 1      | 0.0106383 | 39-14            | 1      | 0.0106383 | 25-18-10                   | 3      | 0.0319149 | 34-20           | 5      | 0.0531915 | 16-26          | 4      | 0.0425532 |
| 22-10-22.1                | 1      | 0.0106383 | 13-17-21-17                        | 1      | 0.0106383 | 17-14-32                | 1      | 0.0106383 | 39-15            | 4      | 0.0425532 | 25-18-11                   | 6      | 0.0638298 | 34-21           | 5      | 0.0531915 | 16-27          | 2      | 0.0212766 |
| 22-10-23.1                | 1      | 0.0106383 | 13-17-21-17                        | 1      | 0.0106383 | 17-15-32                | 1      | 0.0106383 | 39.3-14          | 1      | 0.0106383 | 25-18-12                   | 1      | 0.0106383 | 34-22           | 3      | 0.0319149 | 16-28          | 1      | 0.0106383 |
| 22-10-26.1                | 3      | 0.0319149 | 13-18-15-14.2                      | 1      | 0.0106383 | 18-11-29.2              | 1      | 0.0106383 | 39.3-15          | 1      | 0.0106383 | 25-18-13                   | 1      | 0.0106383 | 35-16           | 2      | 0.0212766 | 16-31          | 1      | 0.0106383 |
| 22-10-28.1                | 1      | 0.0106383 | 13-18-16-16                        | 2      | 0.0212766 | 18-11-30                | 1      | 0.0106383 | 39.3-16          | 1      | 0.0106383 | 25-19-9                    | 1      | 0.0106383 | 35-20           | 2      | 0.0212766 | 17-18          | 2      | 0.0212766 |
| 22-11-18                  | 2      | 0.0212766 | 13-18-17-17                        | 1      | 0.0106383 | 18-12-29.2              | 1      | 0.0106383 | 40.3-14          | 1      | 0.0106383 | 25-19-10                   | 4      | 0.0425532 | 35-22           | 1      | 0.0106383 | 17-23          | 1      | 0.0106383 |
| 22-11-26.1                | 1      | 0.0106383 | 13-18-18-18                        | 1      | 0.0106383 | 18-12-30.2              | 1      | 0.0106383 | 41.3-14          | 1      | 0.0106383 | 25-19-12                   | 2      | 0.0212766 | 35-23           | 1      | 0.0106383 | 17-24          | 3      | 0.0319149 |
| 22-11-27.1                | 1      | 0.0106383 | 13-18-19-16                        | 1      | 0.0106383 | 18-12-31.2              | 1      | 0.0106383 | 41.3-16          | 1      | 0.0106383 | 25-20-11                   | 4      | 0.0425532 | 36-15           | 1      | 0.0106383 | 17-25          | 2      | 0.0212766 |
| 22-12-22.1                | 1      | 0.0106383 | 13-18-19-17                        | 1      | 0.0106383 | 18-12-32                | 1      | 0.0106383 | 42.3-15          | 2      | 0.0212766 | 26-17-10                   | 1      | 0.0106383 | 36-21           | 2      | 0.0212766 | 17-26          | 1      | 0.0106383 |
| 22-12-25.1                | 1      | 0.0106383 | 13-18-19-18                        | 1      | 0.0106383 | 18-12-33                | 1      | 0.0106383 | 43.3-14          | 1      | 0.0106383 | 26-18-8                    | 1      | 0.0106383 |                 |        |           | 17-27          | 4      | 0.0425532 |
| 22-12-27.1                | 1      | 0.0106383 | 13-18-20-18                        | 2      | 0.0212766 | 18-13-30.2              | 2      | 0.0212766 | 43.3-15          | 1      | 0.0106383 | 26-18-10                   | 4      | 0.0425532 |                 |        |           | 17-28          | 1      | 0.0106383 |
| 23-9-18                   | 1      | 0.0106383 | 13-18-20-18                        | 2      | 0.0212766 | 18-13-31.2              | 1      | 0.0106383 |                  |        |           | 26-18-11                   | 1      | 0.0106383 |                 |        |           | 18-27          | 2      | 0.0212766 |
| 23-10-18                  | 1      | 0.0106383 | 13-18-21-17                        | 1      | 0.0106383 | 18-13-32.1              | 1      | 0.0106383 |                  |        |           | 26-18-12                   | 1      | 0.0106383 |                 |        |           | 19-26          | 1      | 0.0106383 |
| 23-10-20                  | 1      | 0.0106383 | 13-19-18-17                        | 1      | 0.0106383 | 18-13-31.2              | 1      | 0.0106383 |                  |        |           | 26-19-10                   | 3      | 0.0319149 |                 |        |           |                |        |           |
| 23-10-23.1                | 1      | 0.0106383 | 13-19-19-16                        | 1      | 0.0106383 | 18-14-31                | 1      | 0.0106383 |                  |        |           | 26-19-11                   | 2      | 0.0212766 |                 |        |           |                |        |           |
| 23-10-26.1                | 1      | 0.0106383 | 13-19-19-17                        | 1      | 0.0106383 | 18-14-32                | 1      | 0.0106383 |                  |        |           | 26-20-10                   | 1      | 0.0106383 |                 |        |           |                |        |           |
| 23-12-19                  | 1      | 0.0106383 | 13-19-20-16                        | 1      | 0.0106383 | 18-15-31                | 1      | 0.0106383 |                  |        |           | 26-20-11                   | 1      | 0.0106383 |                 |        |           |                |        |           |
| 23-12-30.1                | 1      | 0.0106383 | 14-8-19-16                         | 1      | 0.0106383 | 18-16-30                | 1      | 0.0106383 |                  |        |           | 27-16-12                   | 1      | 0.0106383 |                 |        |           |                |        |           |
| 3.1-10-25.1               | 1      | 0.0106383 | 14-15-18-16                        | 1      | 0.0106383 | 19-11-27.2              | 1      | 0.0106383 |                  |        |           | 27-17-10                   | 1      | 0.0106383 |                 |        |           |                |        |           |
| 3.1-11-26.1               | 1      | 0.0106383 | 14-15-20-17                        | 1      | 0.0106383 | 19-11-30.2              | 1      | 0.0106383 |                  |        |           | 27-18-10                   | 3      | 0.0319149 |                 |        |           |                |        |           |
| 24-10-19                  | 1      | 0.0106383 | 14-16-17-17                        | 1      | 0.0106383 | 19-12-25                | 1      | 0.0106383 |                  |        |           | 27-19-10                   | 1      | 0.0106383 |                 |        |           |                |        |           |
| 24-10-23.1                | 1      | 0.0106383 | 14-16-17-18                        | 2      | 0.0212766 | 19-12-27                | 1      | 0.0106383 |                  |        |           | 27-19-11                   | 1      | 0.0106383 |                 |        |           |                |        |           |
| 24-10-24.1                | 1      | 0.0106383 | 14-16-19-17                        | 1      | 0.0106383 | 19-12-27.2              | 1      | 0.0106383 |                  |        |           | 27-20-11                   | 1      | 0.0106383 |                 |        |           |                |        |           |
| 24-10-25.1                | 4      | 0.0425532 | 14-16-19-18                        | 1      | 0.0106383 | 19-12-28                | 1      | 0.0106383 |                  |        |           | 27-20-11                   | 1      | 0.0106383 |                 |        |           |                |        |           |
| 24-10-28.1                | 1      | 0.0106383 | 14-16-22-17                        | 1      | 0.0106383 | 19-12-28.2              | 2      | 0.0212766 |                  |        |           | 28-17-10                   | 2      | 0.0212766 |                 |        |           |                |        |           |
| 24-11-19                  | 1      | 0.0106383 | 14-16-23-18                        | 1      | 0.0106383 | 19-12-29                | 4      | 0.0425532 |                  |        |           | 28-18-12                   | 1      | 0.0106383 |                 |        |           |                |        |           |
| 24-11-22.1                | 1      | 0.0106383 | 14-17-15-17                        | 1      | 0.0106383 | 19-12-30                | 1      | 0.0106383 |                  |        |           | 28-19-8                    | 1      | 0.0106383 |                 |        |           |                |        |           |
| 24-11-25.1                | 1      | 0.0106383 | 14-17-19-17                        | 1      | 0.0106383 | 19-12-30.2              | 2      | 0.0212766 |                  |        |           | 28-19-12                   | 1      | 0.0106383 |                 |        |           |                |        |           |
| 24-11-26.1                | 1      | 0.0106383 | 14-17-20-17                        | 1      | 0.0106383 | 19-12-31.2              | 1      | 0.0106383 |                  |        |           | 28-20-11                   | 1      | 0.0106383 |                 |        |           |                |        |           |
| 24-12-27.1                | 2      | 0.0212766 | 14-17-20-18                        | 1      | 0.0106383 | 19-13-26                | 1      | 0.0106383 |                  |        |           |                            |        |           |                 |        |           |                |        |           |
| 4.1-11-27.1               | 1      | 0.0106383 | 14-17-21-17                        | 1      | 0.0106383 | 19-13-28.2              | 3      | 0.0319149 |                  |        |           |                            |        |           |                 |        |           |                |        |           |
| 25-9-31.1                 | 1      | 0.0106383 | 14-17-21-18                        | 1      | 0.0106383 | 19-13-29                | 1      | 0.0106383 |                  |        |           |                            |        |           |                 |        |           |                |        |           |
| 25-10-24.1                | 1      | 0.0106383 | 14-17-22-17                        | 1      | 0.0106383 | 19-13-29.2              | 2      | 0.0212766 |                  |        |           |                            |        |           |                 |        |           |                |        |           |
