# Supplementary material
Source: PubMed Central journal article supplement (PMC4868827)
Supplement: JZUSB17-0367-TS2.pdf [file JZUSB17-0367-TS2.pdf]

Table S2 *Fst* and *P*-values for allele frequency distribution between Uygur ethnic group and the other groups previously published

| index                            | DXS7132      |          | DXS7423     |          | DXS8378     |          | DXS10101    |          | DXS10103    |          | DXS10079    |          | DXS10135     |          | DXS10148    |          | HPRTB       |          |
|----------------------------------|--------------|----------|-------------|----------|-------------|----------|-------------|----------|-------------|----------|-------------|----------|--------------|----------|-------------|----------|-------------|----------|
|                                  | <i>fst</i>   | <i>p</i> | <i>fst</i>  | <i>p</i> | <i>fst</i>  | <i>p</i> | <i>fst</i>  | <i>p</i> | <i>fst</i>  | <i>p</i> | <i>fst</i>  | <i>p</i> | <i>fst</i>   | <i>p</i> | <i>fst</i>  | <i>p</i> | <i>fst</i>  | <i>p</i> |
| East Timor <i>n</i> =149         | 0.018942791  | 0.0096   | 0.004852069 | 0.233    | 0.014637003 | 0.0338   | 0.004804345 | 0.175    | 0.012786931 | 0.0292   | 0.009808698 | 0.0406   | 0.00094397   | 0.8048   | 0.017215044 | 0.0002   | 0.041114138 | 0.0004   |
| Japanese <i>n</i> =670           | 0.018126247  | 0.0002   | 0.01639825  | 0.0038   | 0.035513347 | 0        | 0.006847614 | 0.0026   | 0.002054331 | 0.2898   | 0.008559446 | 0.0046   | 0.002454549  | 0.174    | 0.001067723 | 0.572    | 0.009438827 | 0.0158   |
| Chinese (Shenyang) <i>n</i> =488 | 0.009364189  | 0.015    | 0.013647346 | 0.0144   | 0.03263786  | 0        | 0.010556195 | 0        | 0.009872335 | 0.0072   | 0.012444392 | 0.0014   | 0.002196013  | 0.272    | 0.001590279 | 0.4324   | 0.001709346 | 0.3724   |
| Greenlander <i>n</i> =198        | 0.054042082  | 0        | 0.001650949 | 0.417    | 0.099415459 | 0        | 0.026470656 | 0        | 0.101375205 | 0        | 0.043140273 | 0        | 0.028237278  | 0        | 0.024007034 | 0        | 0.05881102  | 0        |
| Dane <i>n</i> =210               | -0.0006936   | 0.808    | 0.015352044 | 0.0166   | 0.016373648 | 0.01     | 0.009650292 | 0.0032   | 0.026637592 | 0        | 0.007366153 | 0.0616   | 0.001479864  | 0.6418   | 0.008799167 | 0.0132   | 0.017171131 | 0.0068   |
| Somali <i>n</i> =441             | 0.011383322  | 0.006    | 0.020195637 | 0.0016   | 0.006032858 | 0.0822   | 0.013520447 | 0        | 0.025483294 | 0.0002   | 0.007732215 | 0.0154   | 0.009362247  | 0        | 0.024496713 | 0        | 0.012097931 | 0.0022   |
| Shanghai Han <i>n</i> =309       | 0.011719885  | 0.0108   | 0.016044187 | 0.0144   | 0.032931802 | 0        | 0.004245922 | 0.0934   | 0.008519928 | 0.0306   | 0.006143787 | 0.0566   | 0.006248039  | 0.0082   | 0.001928525 | 0.4216   | 0.003193278 | 0.2358   |
| Bhil (India) <i>n</i> =183       | -0.001606686 | 0.9546   | 0.022030822 | 0.0086   | 0.008803834 | 0.08     | 0.001434672 | 0.6368   | 0.012386452 | 0.0192   | 0.005726392 | 0.1296   | 0.0055347    | 0.0582   | 0.007159379 | 0.041    | 0.007257265 | 0.1062   |
| Malay <i>n</i> =283              | 0.016313562  | 0.0016   | 0.039102089 | 0        | 0.008814944 | 0.0508   | 0.001530311 | 0.5346   | 0.004862963 | 0.137    | 0.010382682 | 0.0074   | 0.00035331   | 0.8818   | 0.002510877 | 0.3072   | 0.004552677 | 0.1542   |
| Taiwanese <i>n</i> =514          | 0.005866505  | 0.0588   | 0.013613808 | 0.0166   | 0.014759477 | 0.0046   | 0.007030135 | 0.0026   | 0.006710492 | 0.0368   | 0.000929417 | 0.5242   | 0.002760316  | 0.1548   | 0.000718041 | 0.7006   | 0.000714006 | 0.526    |
| Guangdong Han <i>n</i> =200      | 0.012450175  | 0.0202   | 0.010826274 | 0.0672   | 0.017891969 | 0.0108   | 0.007283082 | 0.0254   | 0.008684098 | 0.0608   | 0.0018702   | 0.4576   | -0.000114828 | 0.956    | 0.00073709  | 0.7638   | 0.006147596 | 0.1342   |
